# Supplementary material
Source: PubMed Central journal article supplement (PMC9308686)
Supplement: NIHMS1818211-supplement-1818211_Sup_Table_8.pdf [file NIHMS1818211-supplement-1818211_Sup_Table_8.pdf]

| <b>RAST annotation</b>                                                                                                                                    | <b>Prokka annotation</b>                    |                  |
|-----------------------------------------------------------------------------------------------------------------------------------------------------------|---------------------------------------------|------------------|
| Protein                                                                                                                                                   | Protein                                     | Gene             |
| Two-component sensor kinase SA14-24                                                                                                                       | Sensor histidine kinase WalK                | <i>walK</i>      |
| PTS system, mannose-specific IIA component (EC 2.7.1.191) / PTS system, mannose-specific IIB component (EC 2.7.1.191)                                     | PTS system mannose-specific EIIAB component | <i>manX</i>      |
| PTS system, mannose-specific IIC component                                                                                                                | PTS system sorbose-specific EIIC component  | <i>sorA/manY</i> |
| ABC transporter, substrate-binding protein (cluster 1, maltose/g3p/polyamine/iron)                                                                        | Lactose-binding protein                     | <i>lacE</i>      |
| ATP-binding region, ATPase-like: Histidine kinase, HAMP region: Histidine kinase internal region                                                          | Sensor histidine kinase YpdA                | <i>ypdA</i>      |
| Transcriptional regulator, Xre family                                                                                                                     | HTH-type transcriptional regulator ImmR     | <i>immR</i>      |
| hypothetical protein                                                                                                                                      | M protein trans-acting positive regulator   | <i>mga</i>       |
| Regulatory protein Spx                                                                                                                                    | Regulatory protein Spx                      | <i>spxA</i>      |
| hypothetical protein                                                                                                                                      | ABC transporter permease protein YxdM       | <i>yxdM</i>      |
| Nitric oxide reductase activation protein NorD                                                                                                            | hypothetical protein                        | <i>norD</i>      |
| Cell wall-binding protein                                                                                                                                 | Cell wall-binding protein YocH              | <i>yocH</i>      |
| Lactose and galactose permease, GPH translocator family                                                                                                   | Lactose permease                            | <i>lacS</i>      |
| Transcription elongation factor GreA                                                                                                                      | Transcription elongation factor GreA        | <i>greA</i>      |
| hypothetical protein                                                                                                                                      | Catabolite control protein A                | <i>ccpA</i>      |
| Outer membrane TonB-dependent transporter, utilization system for glycans and polysaccharides (PUL), SusC family                                          | TonB-dependent receptor SusC                | <i>susC</i>      |
| Periplasmic solute-binding domain of two-component sensor kinase signaling system /Two-component system sensor histidine kinase/response regulator hybrid | Sensor histidine kinase RcsC                | <i>rscC</i>      |

**Supplementary Table 8 | Annotation of mutated driver genes in this study.**
